# Supplementary material for: Altered Regulation of the Glucose Transporter GLUT3 in PRDX1 Null Cells Caused Hypersensitivity to Arsenite
Source: MDPI journal article supplement (doi:10.3390/cells12232682), 2023-11-22
Supplement: s1 [file s1]

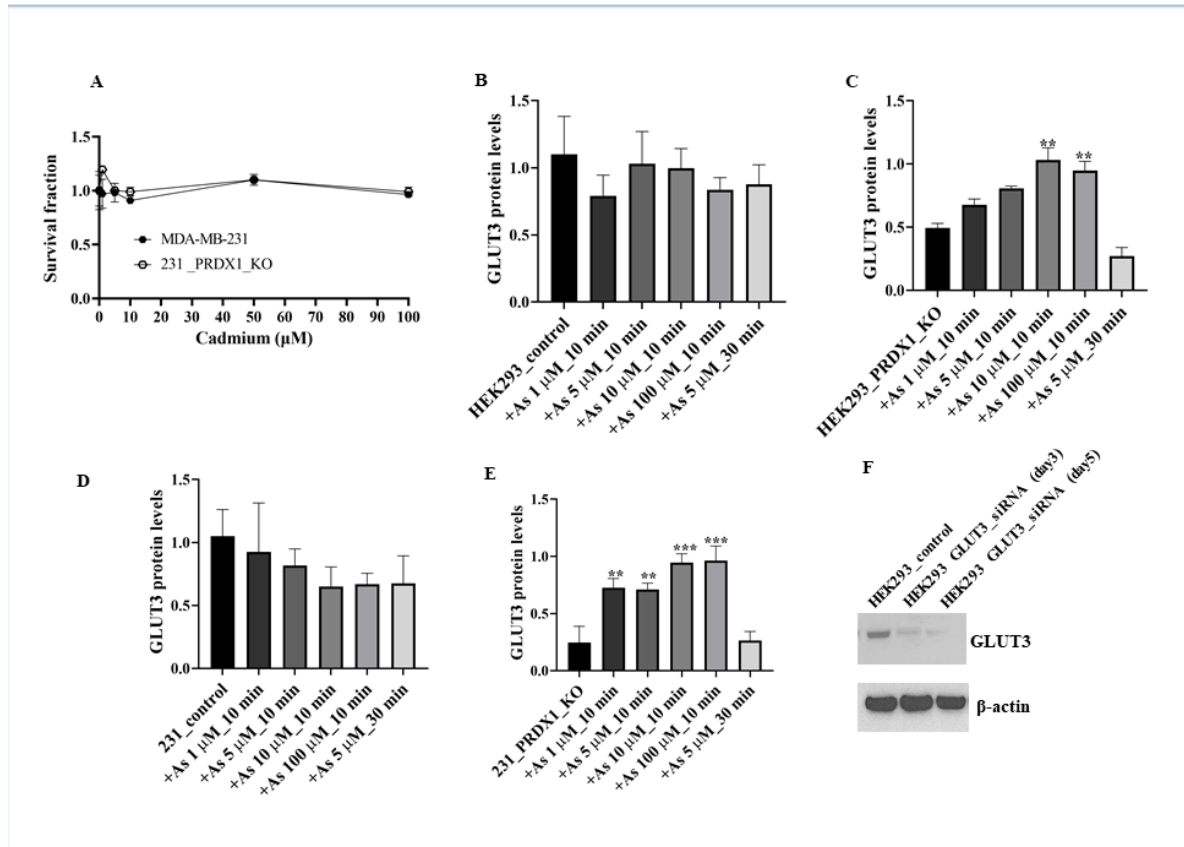

**Figure S1.** (A) Clonogenic survival assay showing cadmium sensitivity in MDA-MB-231 and MDA-MB-231\_PRDX1 null cells. (B and C) Quantification of GLUT3 protein levels by Western blot in HEK293\_control and HEK293\_PRDX1 null cells treated with the indicated concentrations of arsenite. (D and E) Quantification of GLUT3 protein levels by Western blot in MDA-MB-231\_control and MDA-MB-231\_PRDX1 null cells treated with the indicated concentrations of arsenite. (F) Western blot showing GLUT3 knockdown by siRNA in HEK293 cells.  $\beta$ -actin was used as a loading control.
